# Supplementary material for: Design of donor–acceptor conjugated polymers based on diketopyrrolopyrrole for NIR-II multifunctional imaging
Source: Royal Society of Chemistry journal article supplement (doi:10.1039/d3tb02864j), 2024-01-01
Supplement: d3tb02864j1.pdf [file d3tb02864j1.pdf]

## Supporting information

### **Design of Donor-Acceptor conjugated polymers based on Diketopyrrolopyrrole for NIR-II multifunctional imaging**

Mengyu Cao<sup>1#</sup>, Xuezhen Ma<sup>2#</sup>, Chang Wang<sup>1</sup>, Wentao Zou<sup>1</sup>, Fang Wang<sup>1</sup>, Bing Yu<sup>1,3\*</sup>, Hailin Cong<sup>1,3,4\*</sup> and Youqing Shen<sup>1,5</sup>

1. College of Chemistry and Chemical Engineering, College of Materials Science and Engineering, Institute of Biomedical Materials and Engineering, Qingdao University, Qingdao, 266071, China
2. The Affiliated Qingdao Central Hospital of Qingdao University, Qingdao, 266071, China
3. State Key Laboratory of Bio-Fibers and Eco-Textiles, Qingdao University, Qingdao 266071, China
4. School of Materials Science and Engineering, Shandong University of Technology, Zibo 255000, China
5. Key Laboratory of Biomass Chemical Engineering of Ministry of Education, Center for Bionanoengineering, and Department of Chemical and Biological Engineering, Zhejiang University, Hangzhou, Zhejiang, 310027, China

\*Corresponding authors at: Institute of Biomedical Materials and Engineering, College of Chemistry and Chemical Engineering, Qingdao University, Qingdao, 266071, China.

E-mail addresses: yubing198@qdu.edu.com (B. Yu); conghailin@sdut.edu.cn (H. Cong)

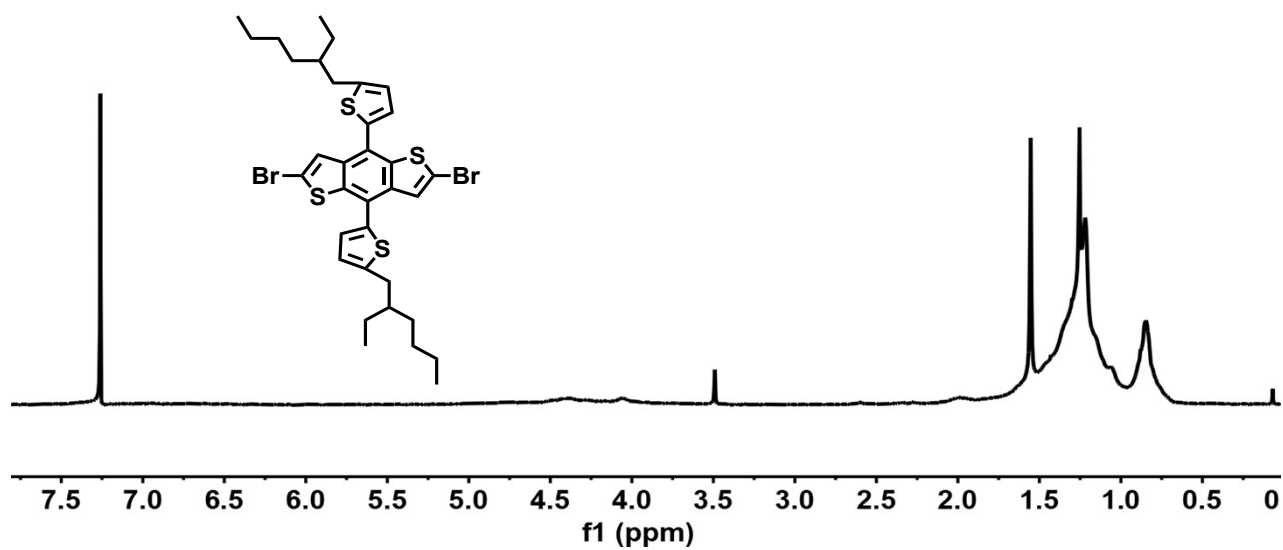

**Figure S1.** <sup>1</sup>H-NMR spectrum of 2,6-Dibromo-4,8-bis(5-(2-ethylhexyl)thiophene-2-yl)phenylpropan [1,2-b:4,5-b'] dithiophene.

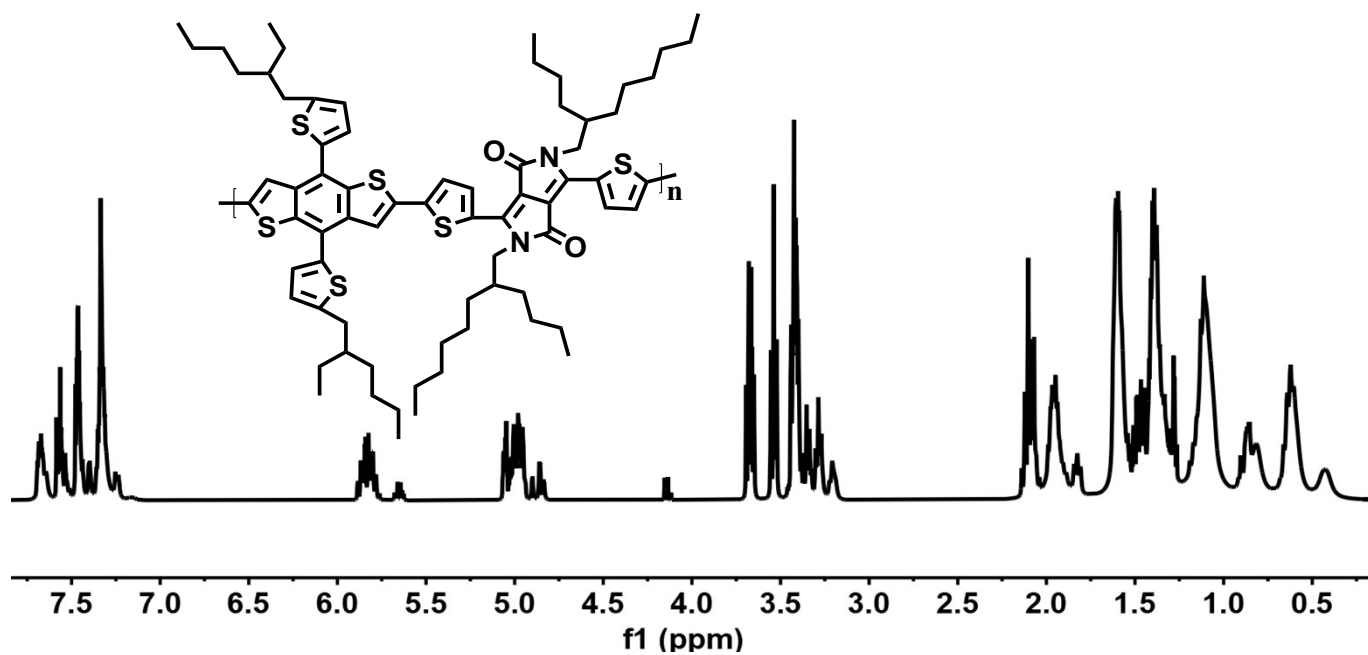

**Figure S2.**  $^1\text{H-NMR}$  spectrum of 2,5-bis (2-butyloctyl) -3,6-bis (4-(trimethylsilyl)) cyclopentyl-1,3-diene-1-yl) -2,5-dihydropyrrolo [3,4-c] pyrrole-1,4-dione.

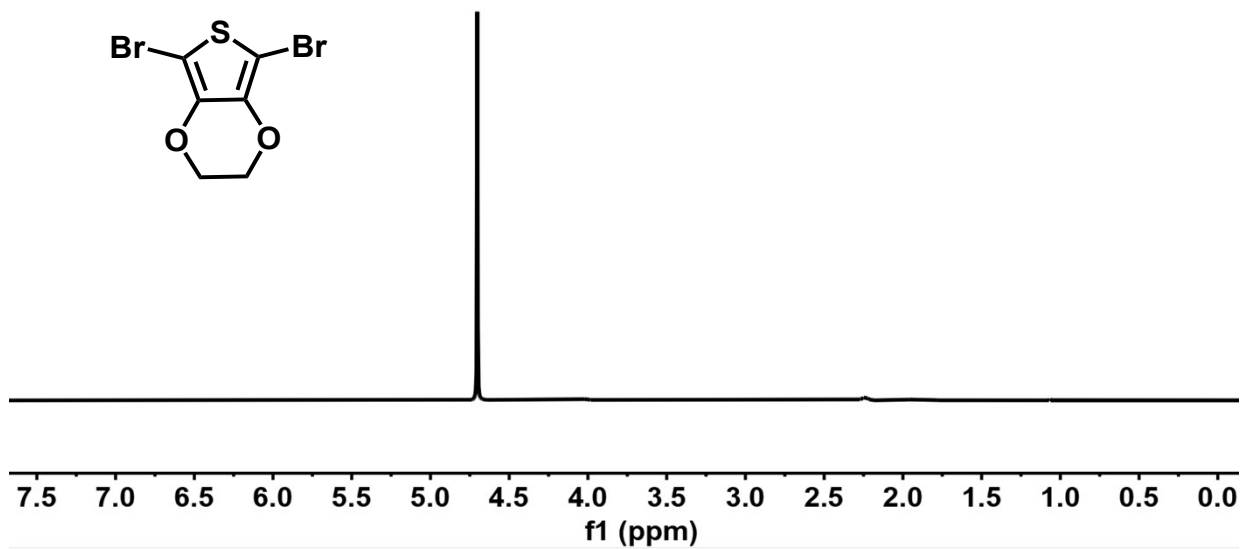

**Figure S3.** <sup>1</sup>H-NMR spectrum of 5,7-dibromo-2,3-dihydrothieno[3,4-*b*][1,4]dioxine.

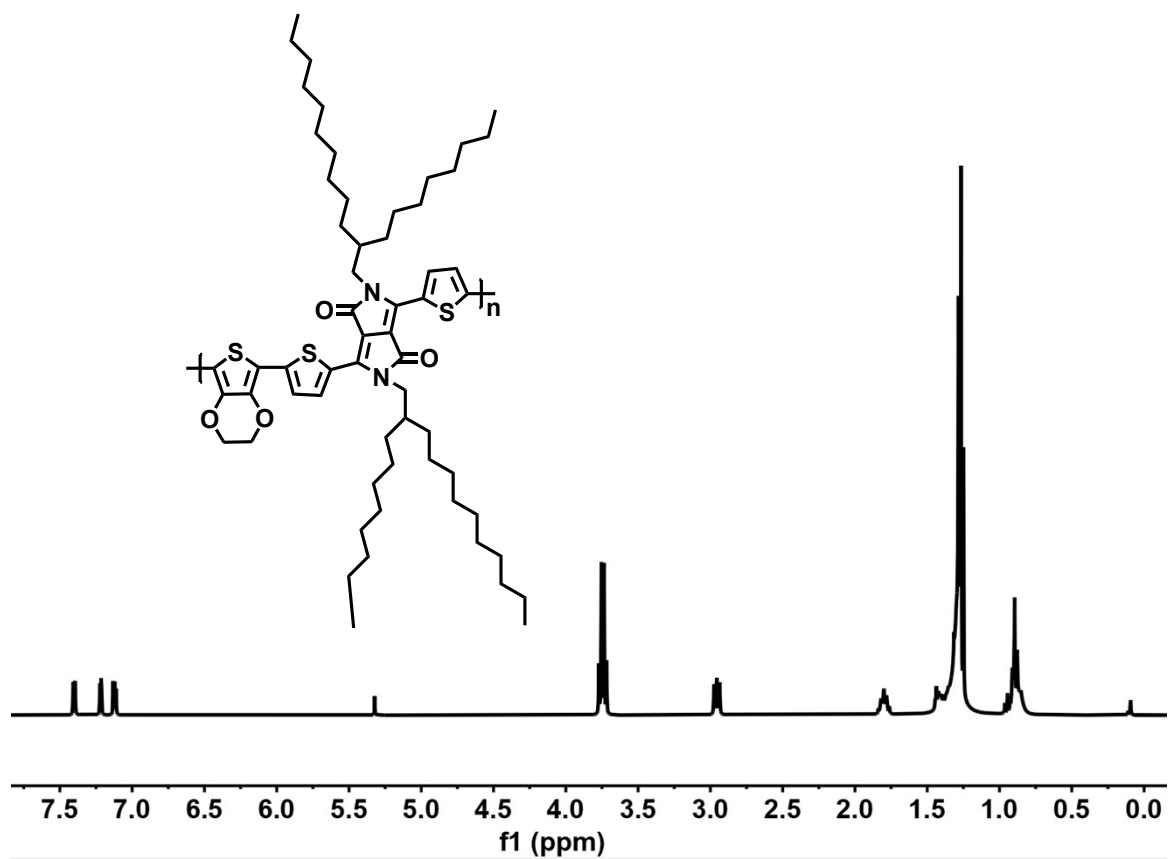

**Figure S4.**  $^1\text{H}$ -NMR spectrum of 3-(5-(7-methyl-2,3-dihydrothieno[3,4-b][1,4]dioxin-5-yl)thiophen-2-yl)-6-(5-methylthiophen-2-yl)-2,5-bis(2-octyldodecyl)-2,5-dihydropyrrolo[3,4-c]pyrrole-1,4-dione.

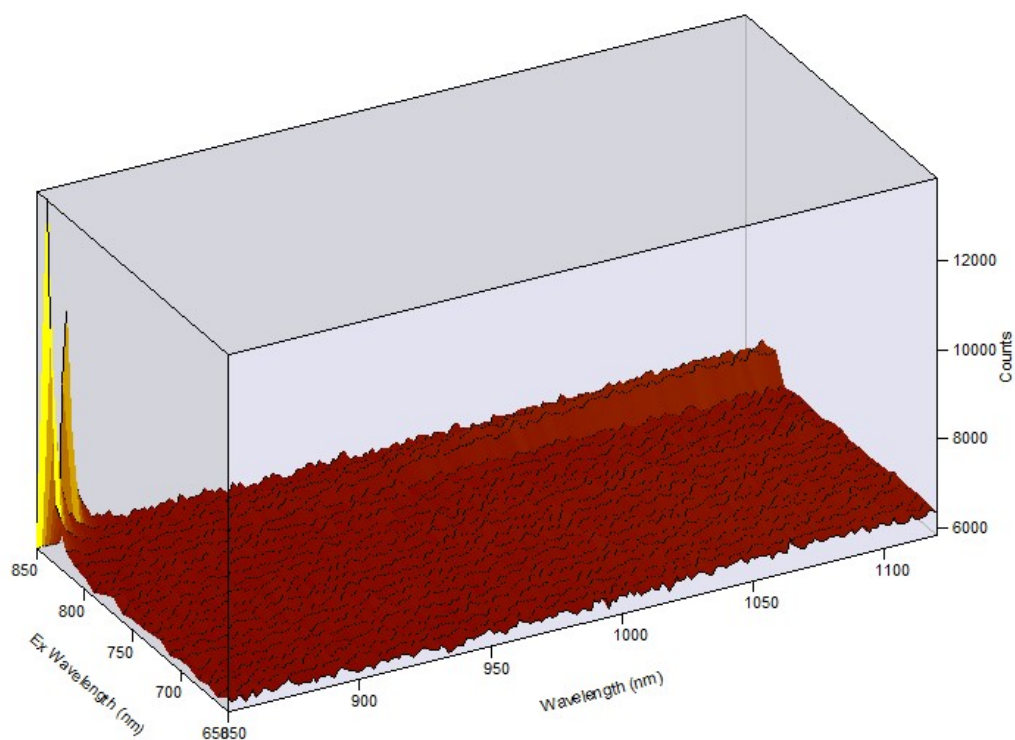

**Figure S5.** Multi-excitation emission spectra of PBDT-DPP (Excitation wavelength range 650-850 nm, emission wavelength range 850-1120 nm).

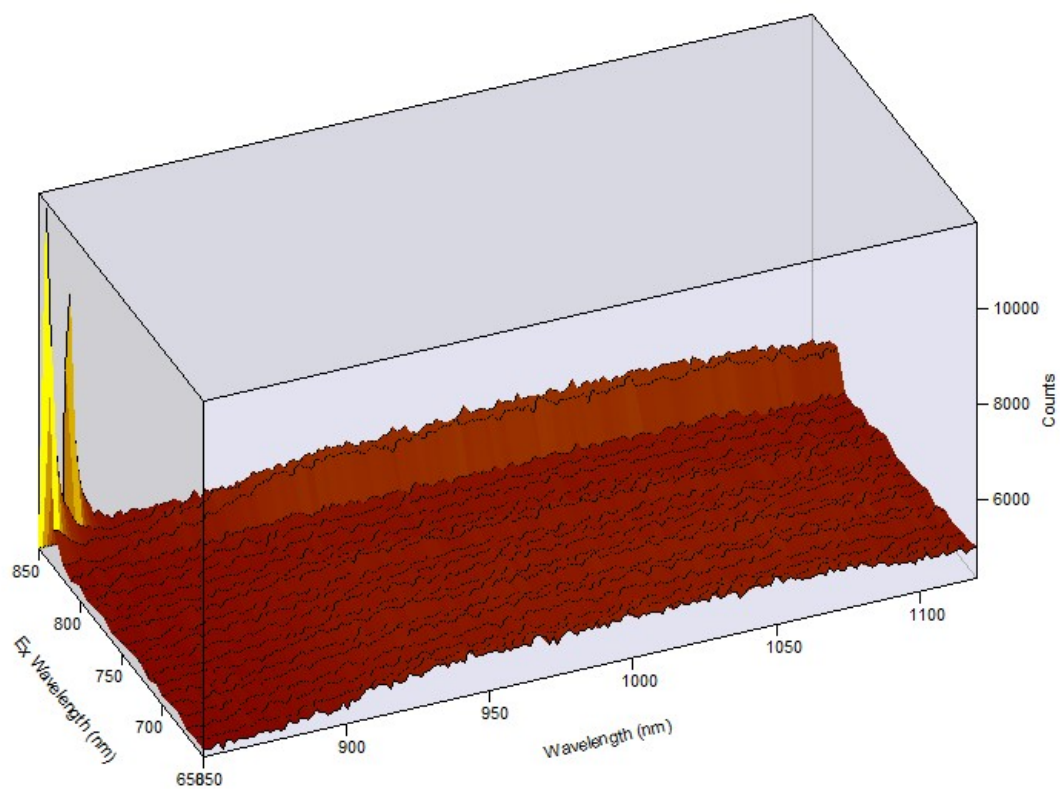

**Figure S6.** Multi-excitation emission spectra of EDOT-DPP (Excitation wavelength range 650-850 nm, emission wavelength range 850-1120 nm).

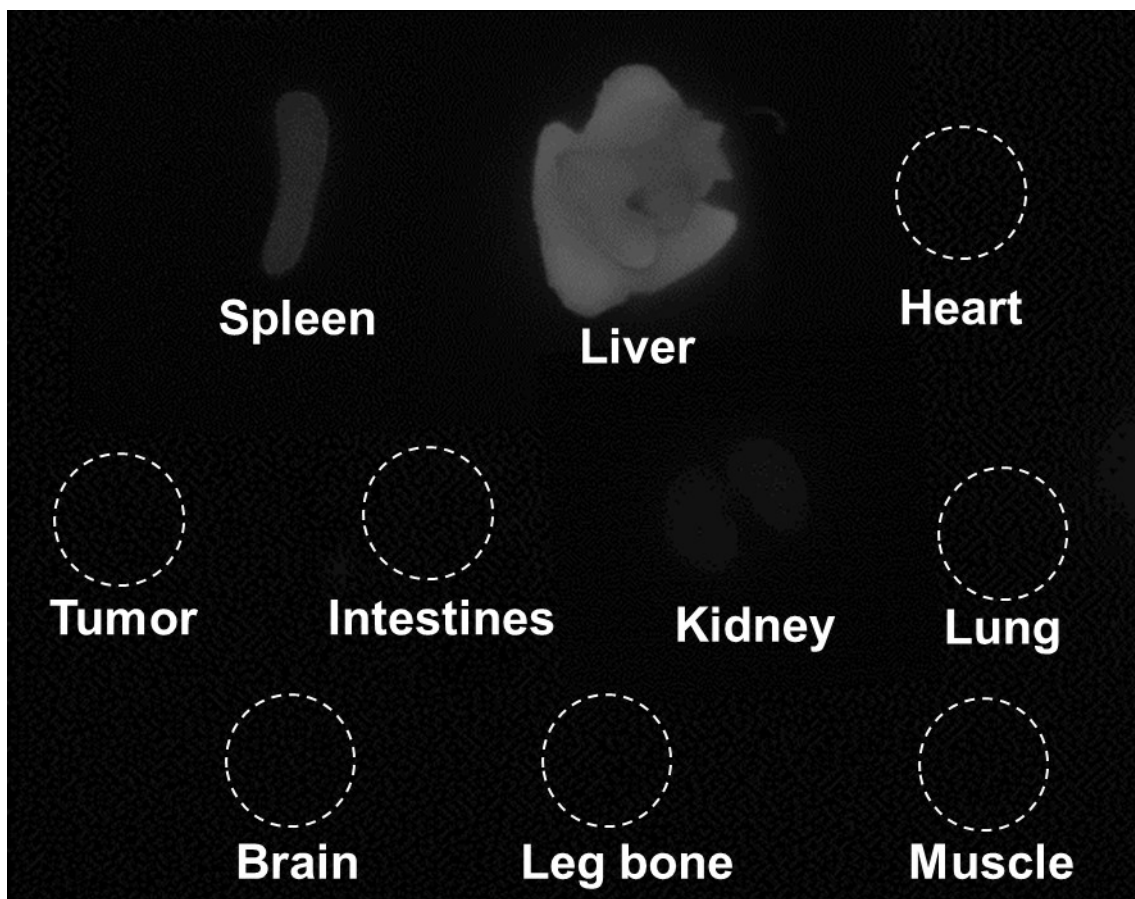

**Figure S7.** Organ imaging after three weeks of single injection of EDOT-DPP nanoparticles.
